# Supplementary material
Source: PubMed Central journal article supplement (PMC4142699)
Supplement: NIHMS525195-supplement-1.pdf [file NIHMS525195-supplement-1.pdf]

## Supplementary Figures 1-20

### Supplementary Figure 1

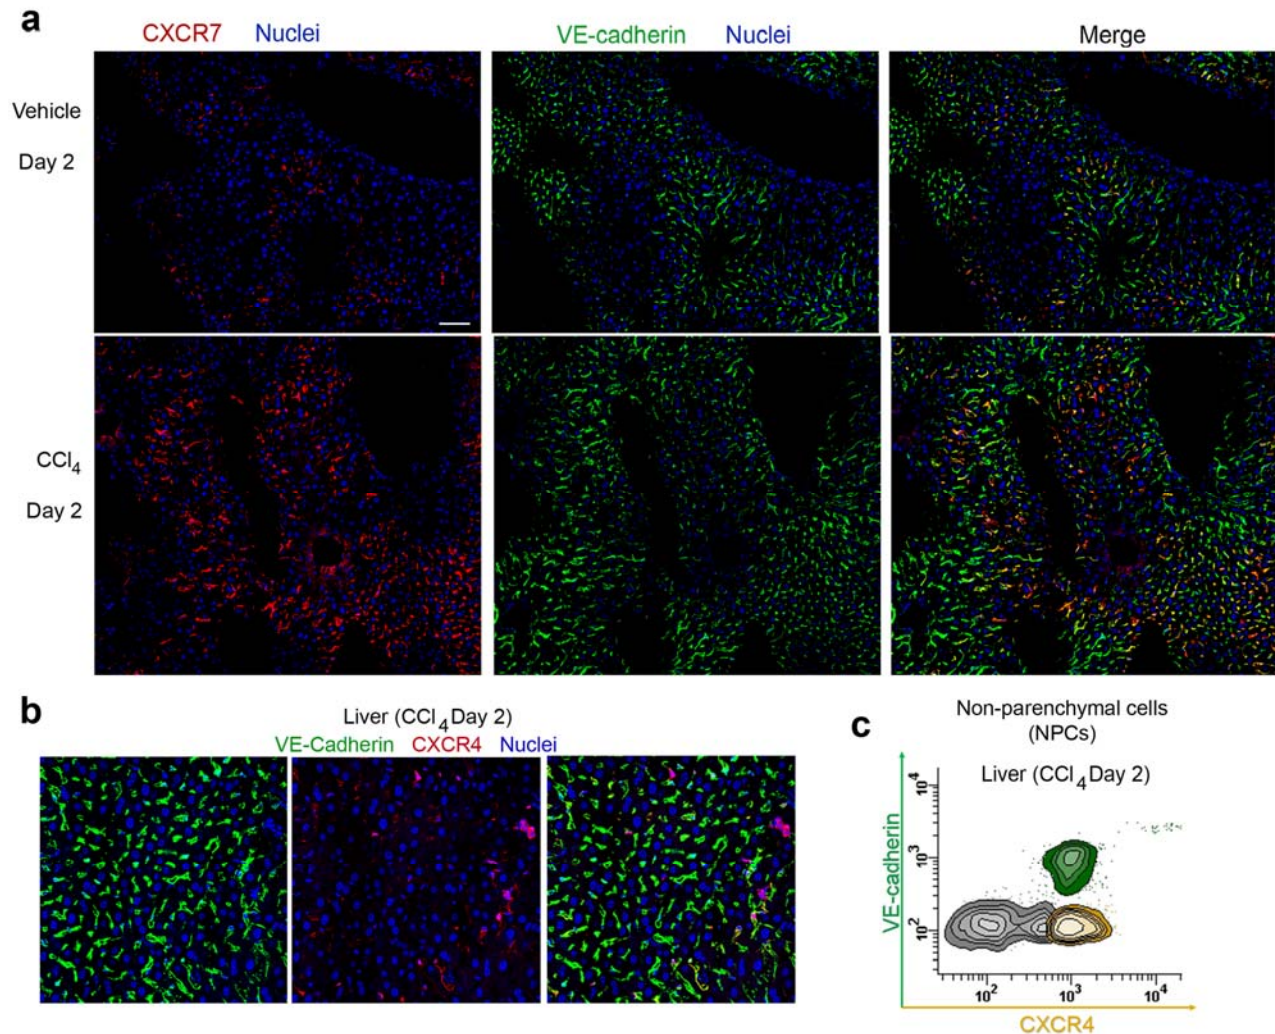

**Supplementary Figure 1. Specific upregulation of stromal-derived factor (SDF-1) receptor CXCR7 in mouse liver sinusoidal endothelial cells (LSECs) after acute liver injury.**

**a) Significantly enhanced expression of CXCR7 on LSECs by single CCl<sub>4</sub> injection, compared to mice administered with vehicle.** Two days after intraperitoneal (i.p.) CCl<sub>4</sub> injury, expression of CXCR7 was determined on liver sections. Liver cyrosections were stained for CXCR7 (red fluorescence) and endothelial cell (EC)-specific marker VE-cadherin (green fluorescence). There was a global upregulation of CXCR7 on VE-cadherin<sup>+</sup> LSECs by injection of CCl<sub>4</sub> at day 2. Scale bar = 250  $\mu$ m.

**b, c) Expression of SDF-1 receptor CXCR4 in the liver after CCl<sub>4</sub> injury.** Two days after i.p. CCl<sub>4</sub> injection, expression of CXCR4 was also examined on liver sections by immunostaining (b) and flow cytometry (c) for CXCR4. Note the expression of CXCR4 on both VE-cadherin<sup>+</sup> ECs and VE-cadherin<sup>-</sup> non-ECs.

## Supplementary Figure 2

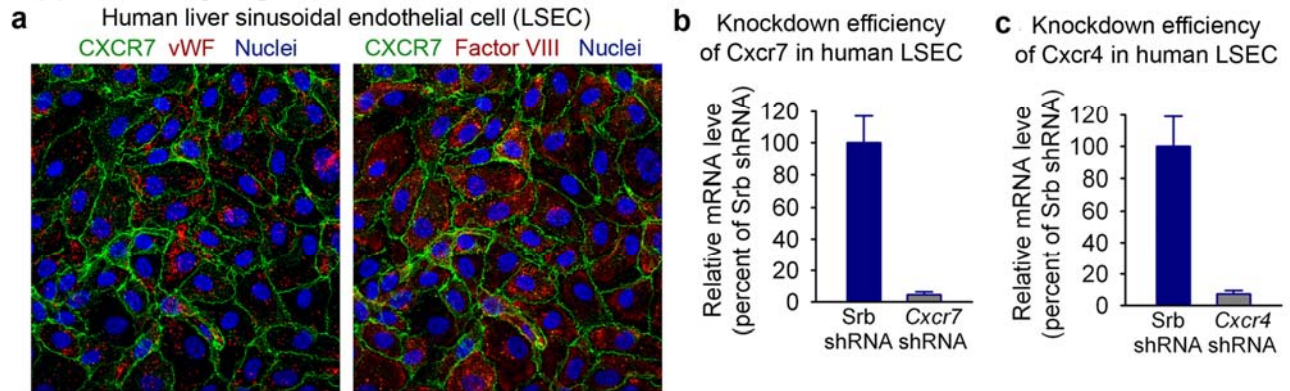

**Supplementary Figure 2. Selective knockdown of *Cxcr4* and *Cxcr7* in cultivated human LSECs.**

**a) Characterization of cultivated human LSECs.** Early passages of human LSECs were utilized for deciphering SDF-1 signaling. Human LSECs express surface receptor CXCR7, LSEC-specific marker von Willebrand factor (vWF) and coagulation Factor VIII. LSECs were obtained from ScienCell Research Laboratories and cultured with provided medium. Magnification: 400 x.

**b, c) shRNA-mediated silencing of *Cxcr4* and *Cxcr7* in cultivated human LSEC.** Human LSECs were treated with lentivirus encoding shRNA against *Cxcr4* or *Cxcr7* (Openbiosystems). After incubation with lentiviral particles, CXCR7 (b) and CXCR4 (c) levels were determined, and the knockdown efficiency was determined by comparing with LSEC treated with Scrambled (Srb) lentivirus; N = 5 in each group.

### Supplementary Figure 3

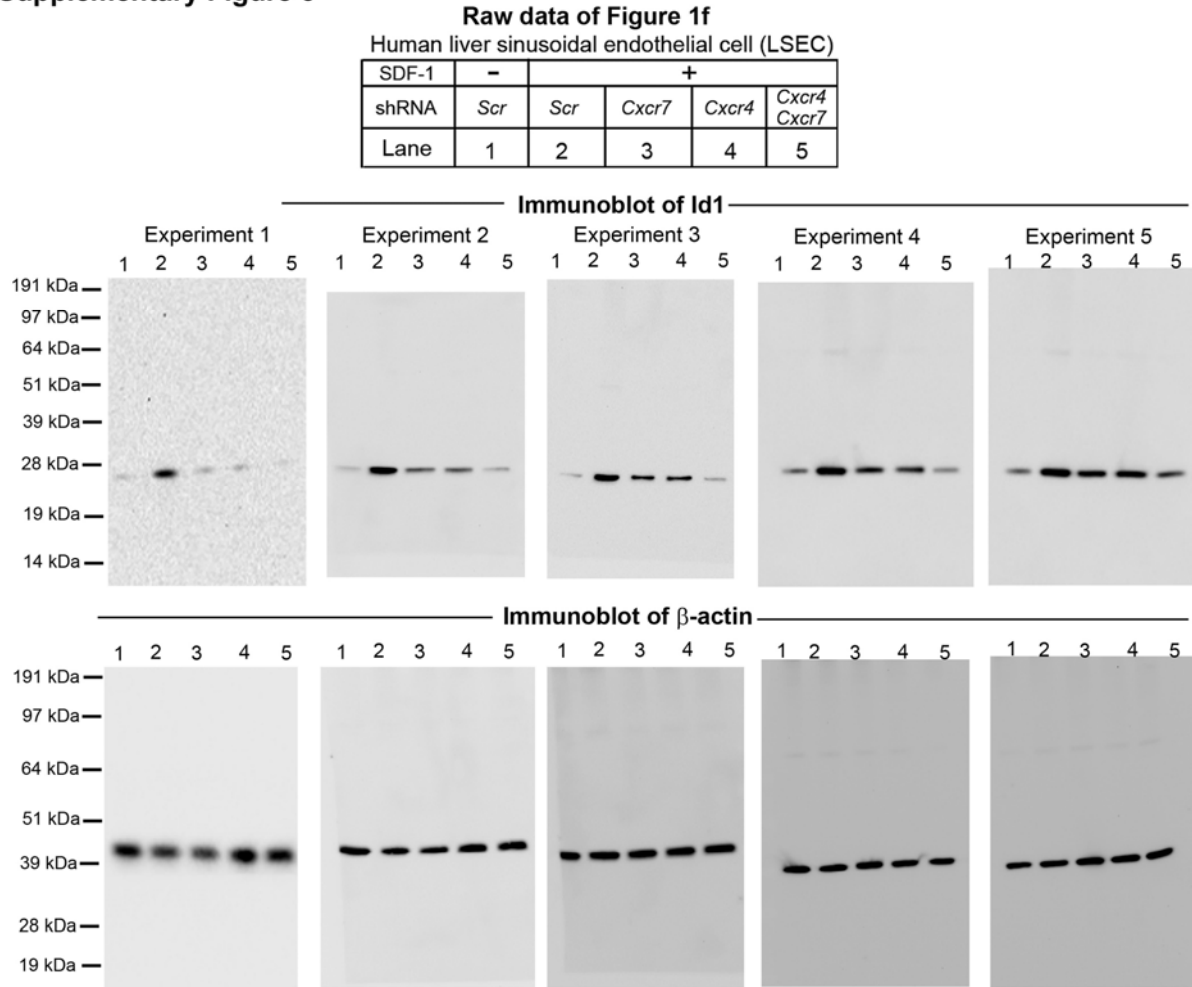

**Supplementary Figure 3. Raw immunoblot data presented in Figure 1f that demonstrates the requirement of CXCR4 and CXCR7 in SDF-1-induced upregulation of inhibitor of DNA binding 1 (Id1).** Individual immunoblot images with labeled protein markers for five independent experiments presented in Fig. 1f.  $\beta$ -actin was utilized as protein loading control. The expression of Id1 protein was quantified after normalizing to  $\beta$ -actin and presented in Figure 1f bottom panel. These reproducible data demonstrate that shRNA knockdown of *Cxcr4* and *Cxcr7* blocks Id1 induction caused by SDF-1 stimulation.

### Supplementary Figure 4

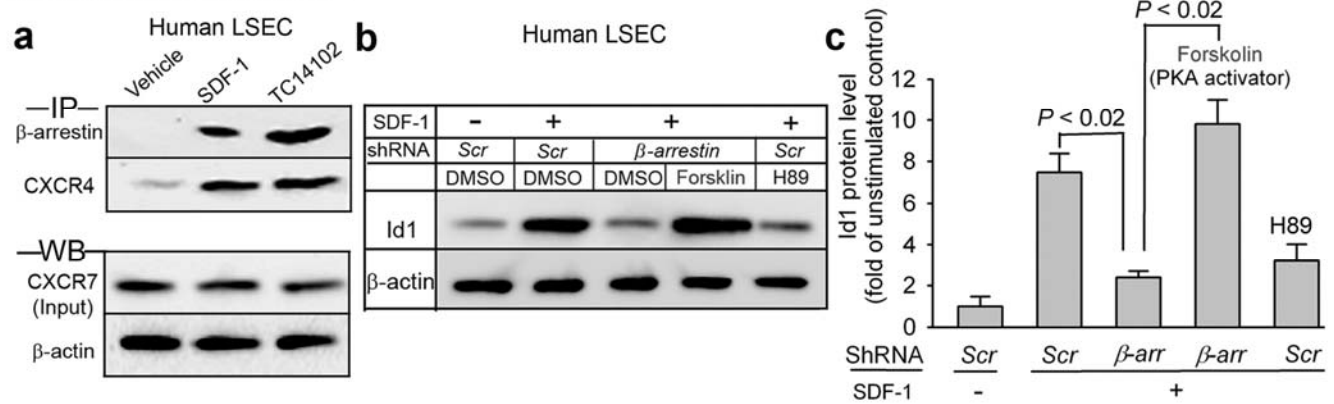

**Supplementary Figure 4. SDF-1 and CXCR7-selective agonist TC14102 induce association of CXCR7 with CXCR4 and  $\beta$ -arrestin leading to Id1 upregulation.**

**a)** Immunoprecipitation and Western blot (IP-WB) reveals the association of CXCR4, CXCR7, and  $\beta$ -arrestin in LSECs, upon treatment of SDF-1 and CXCR7-specific agonist TC14102.

**b, c)** Association of CXCR7, CXCR4, and  $\beta$ -arrestin enables Id1 expression. Genetic silencing of  $\beta$ -arrestin inhibited Id1 upregulation by SDF-1, which was restored by protein kinase A (PKA) activator Forskolin. Inhibition of PKA by compound H89 abrogated Id1 upregulation by SDF-1. Representative immunoblot image is shown in (b), and the quantification of Id1 protein level is shown in panel (c).  $\beta$ -arr,  $\beta$ -arrestin shRNA; N= 4.

## Supplementary Figure 5

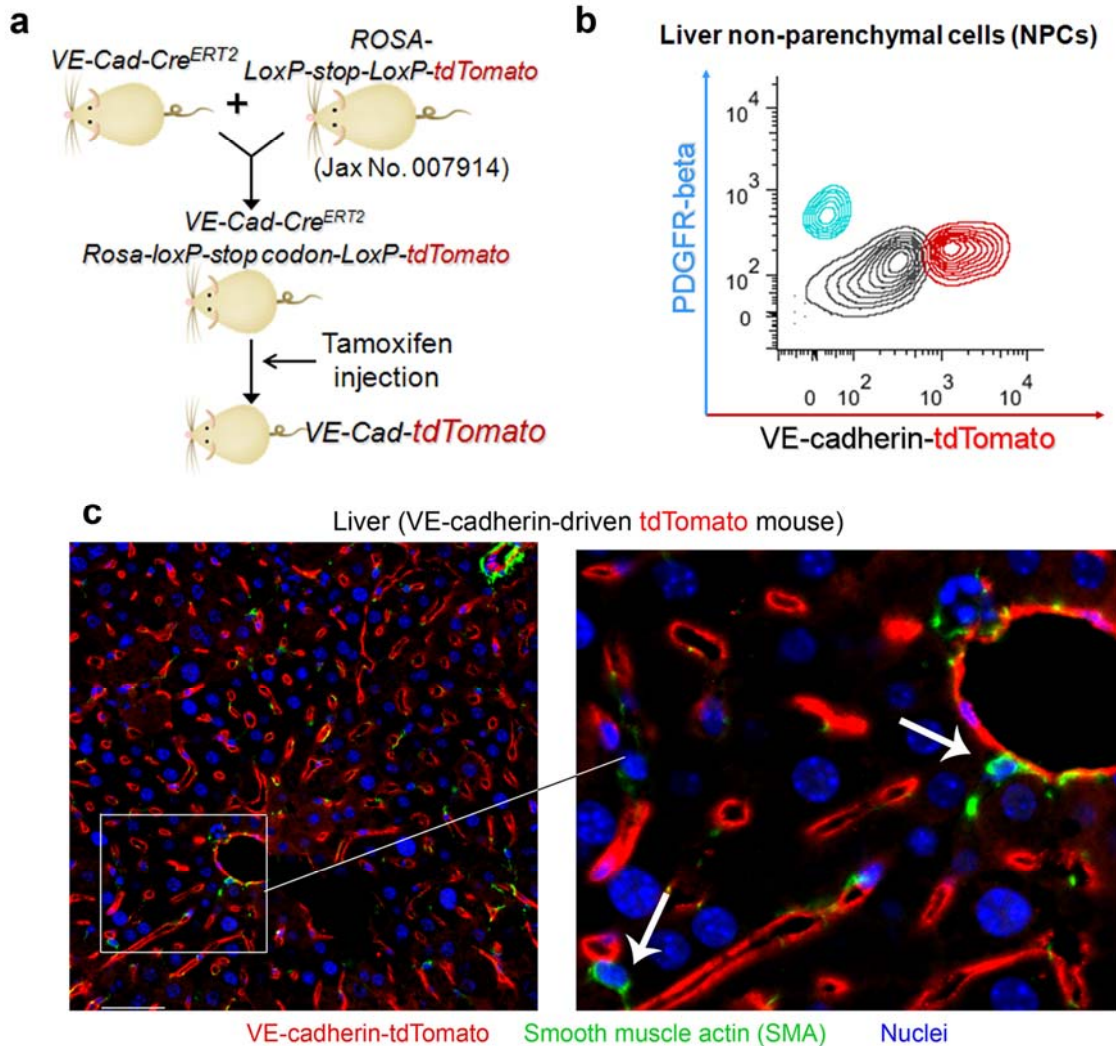

**Supplementary Figure 5. VE-cadherin-Cre<sup>ERT2</sup> is selectively induced in liver endothelial cells (ECs) but not liver cells that are PDGF receptor  $\beta^+$  (PDGFR $\beta^+$ ) or  $\alpha$ -smooth muscle actin (SMA)<sup>+</sup>.**

**a) Reporter mouse line that traces the expression of tamoxifen-response Cre<sup>ERT2</sup> driven by VE-cadherin promoter (*VE-cad-Cre<sup>ERT2</sup>*).** Mice expressing *VE-cad-Cre<sup>ERT2</sup>* were crossed with reporter mice carrying tdTomato red fluorescent protein following *loxP*-flanked STOP codon. Injection of tamoxifen induced specific excision of “STOP” in VE-cad-Cre<sup>+</sup>tdTomato<sup>+</sup> offsprings and expression of tdTomato fluorescent protein in VE-cadherin<sup>+</sup> cells.

**b) *VE-cad-Cre<sup>ERT2</sup>* does not target hepatic cells that express PDGFR $\beta$ .** Flow cytometry analysis of liver non-parenchymal cells (NPCs). Note that there is no overlap between VE-cadherin-driven tdTomato signals and cells that are positive for PDGFR $\beta$ .

**c) Co-staining of SMA with *VE-cadherin* driven tdTomato (red fluorescence).** Note the distinct localization between tdTomato signal and SMA in the liver. These data indicate that *VE-cad-Cre<sup>ERT2</sup>* does not target PDGFR $\beta^+$ SMA<sup>+</sup> hepatic cells. Scale bar = 50  $\mu$ m.

## Supplementary Figure 6

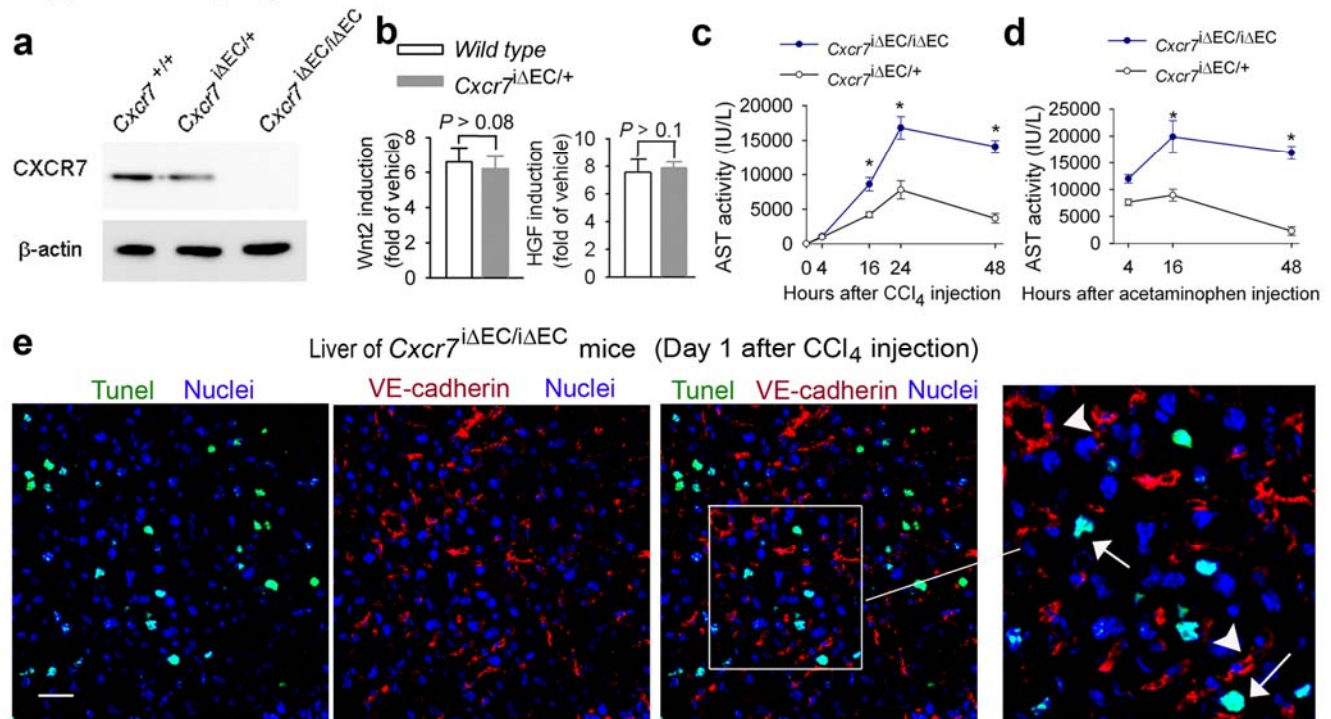

**Supplementary Figure 6. Characterization of mice with EC-specific inducible deletion of *Cxcr7* ( $Cxcr7^{i\Delta EC/\Delta EC}$ ) using *VE-cad-Cre<sup>ERT2</sup>*.**

**a) Inducible EC-specific genetic deletion of *Cxcr7* ( $Cxcr7^{i\Delta EC/\Delta EC}$ ) in adult mice using *VE-cad-Cre<sup>ERT2</sup>*.** Mice harboring loxP-flanked *Cxcr7* were crossed with *VE-cad-Cre<sup>ERT2</sup>*. EC-specific ablation of *Cxcr7* was induced by tamoxifen injection into the resultant  $Cre^+ Cxcr7^{loxP/loxP}$  or  $Cre^+ Fgfr1^{loxP/loxP}$  mice. Protein level of CXCR7 was analyzed in LSECs isolated from mice 14 days after tamoxifen injection. This *VE-cad-Cre<sup>ERT2</sup>* deletion system led to specific ablation of *Cxcr7* in adult mouse LSECs.

**b) Regenerative response after acute liver injury is not affected in  $Cxcr7^{i\Delta EC/+}$  control mice, compared to wild type ( $Cxcr7^{+/+}$ ) mice.** Protein levels of hepatic-active factors in LSECs of  $Cxcr7^{i\Delta EC/+}$  and wild type mice were compared at day 2 after injury. There was little difference in the deployment of hepatocyte growth factor (HGF) and Wnt2 from LSECs. Thus,  $Cxcr7^{i\Delta EC/+}$  mice that possess *Cxcr7* EC haplodeficiency represents ideal mouse genotype to control for Cre toxicity; N = 4.

**c, d) Liver injury caused by single injection of  $CCl_4$  (c) and acetaminophen (d) is exacerbated in  $Cxcr7^{i\Delta EC/\Delta EC}$  mice.** There was significant increase in the serum level of aspartate aminotransferase (AST) activity at indicated time points; \*,  $P < 0.05$ , compared to control group; N = 4.

**e) Absence of EC cell death in  $Cxcr7^{i\Delta EC/\Delta EC}$  mice after liver injury.** TUNEL assay was performed in the liver of  $Cxcr7^{i\Delta EC/\Delta EC}$  mice at day 1 after  $CCl_4$ . The majority of apoptotic cells (green fluorescence) were non-VE-cadherin cells, such as hepatocytes (white arrow). Apoptosis was undetectable in VE-cadherin<sup>+</sup> LSECs (red fluorescence, arrow head). TUNEL assay was performed using In Situ Cell Death Detection Kit (Roche); Scale bar = 50  $\mu$ m.

### Supplementary Figure 7

Percentage of CXCR7<sup>+</sup>VE-cadherin<sup>+</sup> LSEC population among non-parenchymal cells (NPCs)

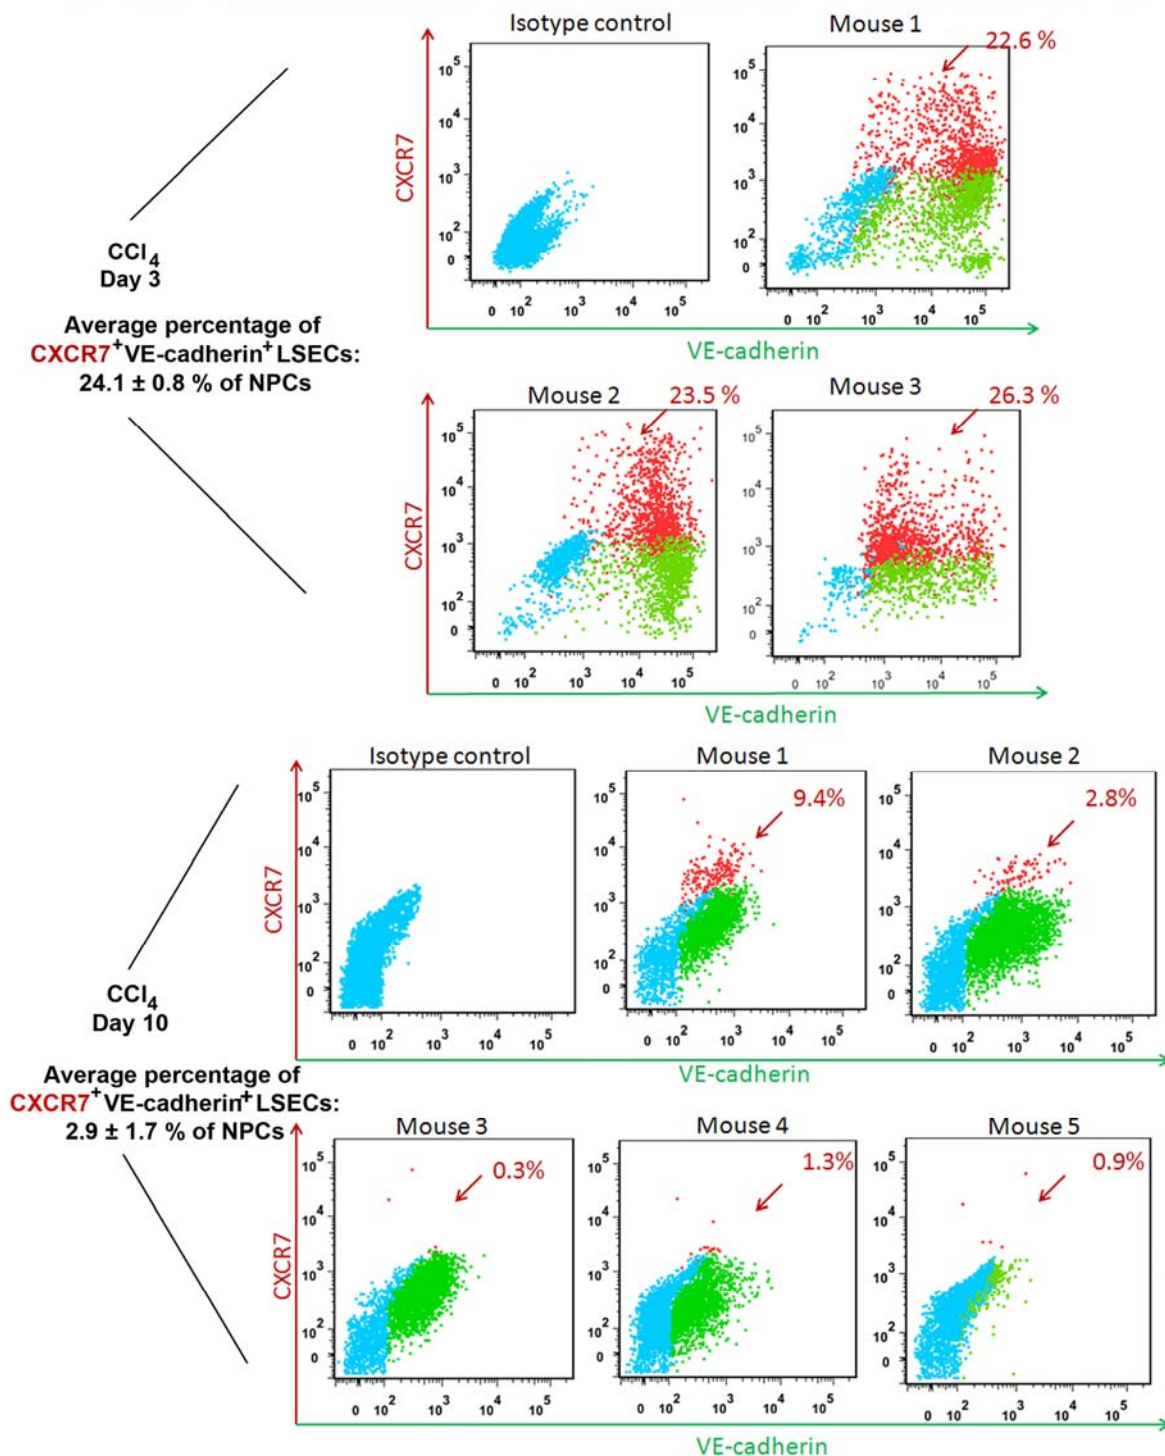

**Supplementary Figure 7. Flow cytometry graph presented in Figure 2e.** CXCR7 protein level was suppressed in LSECs by repeated CCl<sub>4</sub> injection. Independently repeated experiments presented in Fig. 2e are shown. The percentage of VE-cadherin<sup>+</sup> LSECs that express CXCR7 was significantly decreased at day 10 after repeated CCl<sub>4</sub> every three days, relative to that of mouse liver at day 3 after first injection.

## Supplementary Figure 8

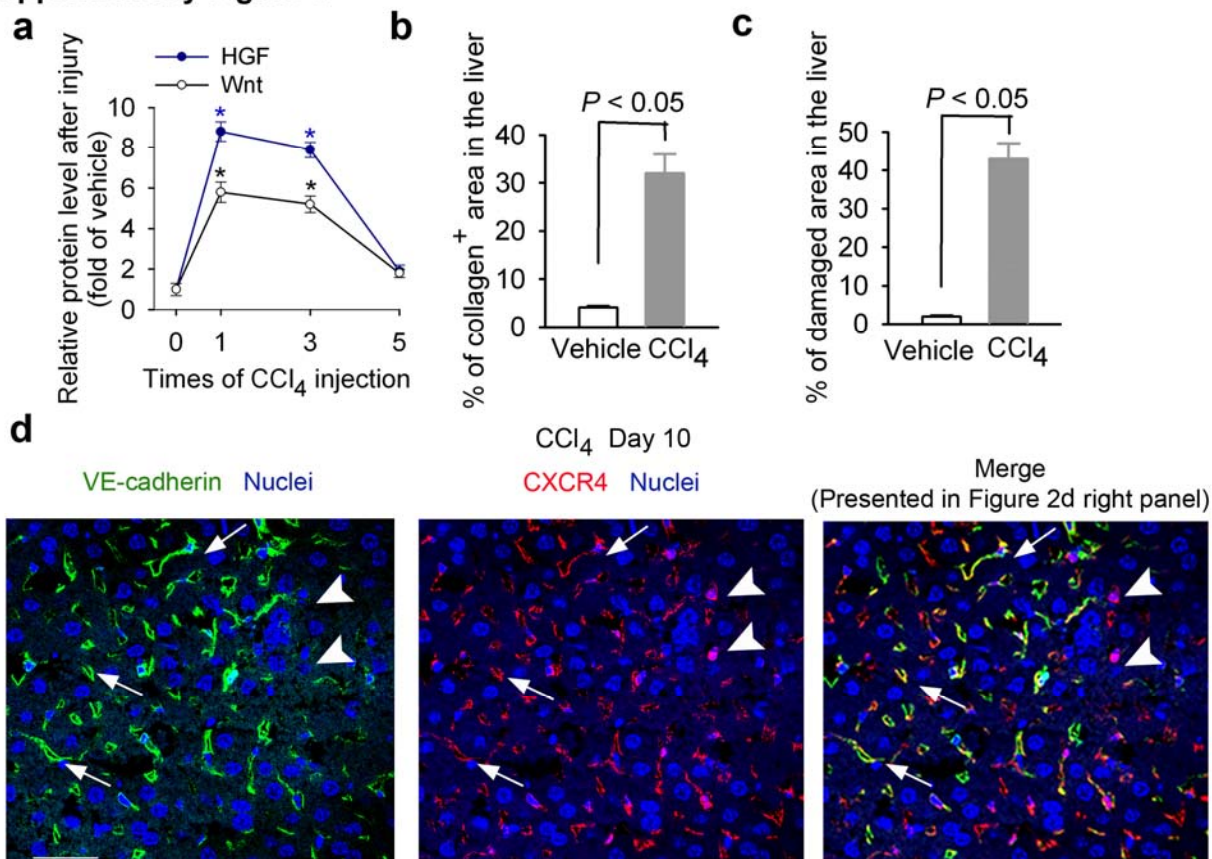

### Supplementary Figure 8. Repeated injection of CCl<sub>4</sub> impairs production of pro-regenerative angiocrine factor HGF and Wnt2, leading to fibrotic liver injury.

**a)** Suppressed production of hepatic-active angiocrine factors HGF and Wnt2 from LSECs by repeated CCl<sub>4</sub> injury. CCl<sub>4</sub> was injected to wild type mice every 3 days (Figure 2a). LSECs were isolated from mice at day 2 after the indicated injection time. Quantification of HGF and Wnt2 protein expression demonstrates of the diminished expression of pro-regenerative angiocrine factors by LSECs after 3<sup>rd</sup> injection of CCl<sub>4</sub>; \*,  $P < 0.05$  compared to vehicle-treated group;  $N = 4$ .

**b, c)** Grade of fibrotic injury caused by repeated CCl<sub>4</sub> injection. Liver damage caused by CCl<sub>4</sub> injury was assessed. Both collagen<sup>+</sup> region detected by Sirius red staining (b) and necrotic area were quantified, and compared to vehicle-injected mice; Representative Sirius red staining is shown in Figure 2B;  $N = 5$ .

**d)** Immunostaining of CXCR4 (red fluorescence) and liver ECs (VE-cadherin, green fluorescence) on cryosections of CCl<sub>4</sub> injured liver. CXCR4 was upregulated on VE-cadherin<sup>+</sup> LSECs (white arrow) and VE-cadherin<sup>-</sup> non-ECs (arrowhead) by repeated injection of CCl<sub>4</sub>.



### Supplementary Figure 9

#### Immunoblot of $\alpha$ -smooth muscle actin (SMA)

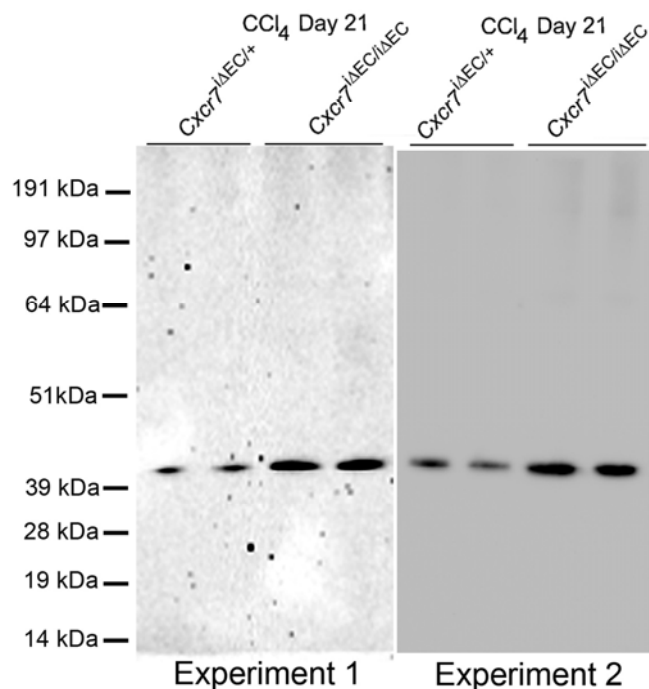

#### Immunoblot of $\beta$ -actin

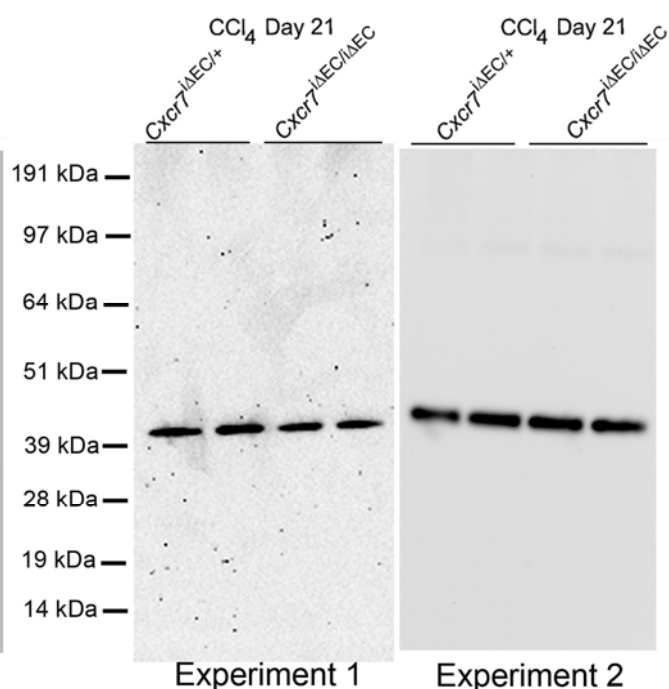

**Supplementary Figure 9. Deletion of *Cxcr7* in ECs (*Cxcr7*<sup>ΔEC/ΔEC</sup>) of mice exacerbates liver fibrosis after repeated CCl<sub>4</sub> injection.** The degree of liver fibrosis was assessed by immunoblot against SMA expressed by activated myofibroblasts. Raw data of three independent immunoblot images with labeled protein markers are presented.  $\beta$ -actin immunoblot served as protein loading control.

### Supplementary Figure 10

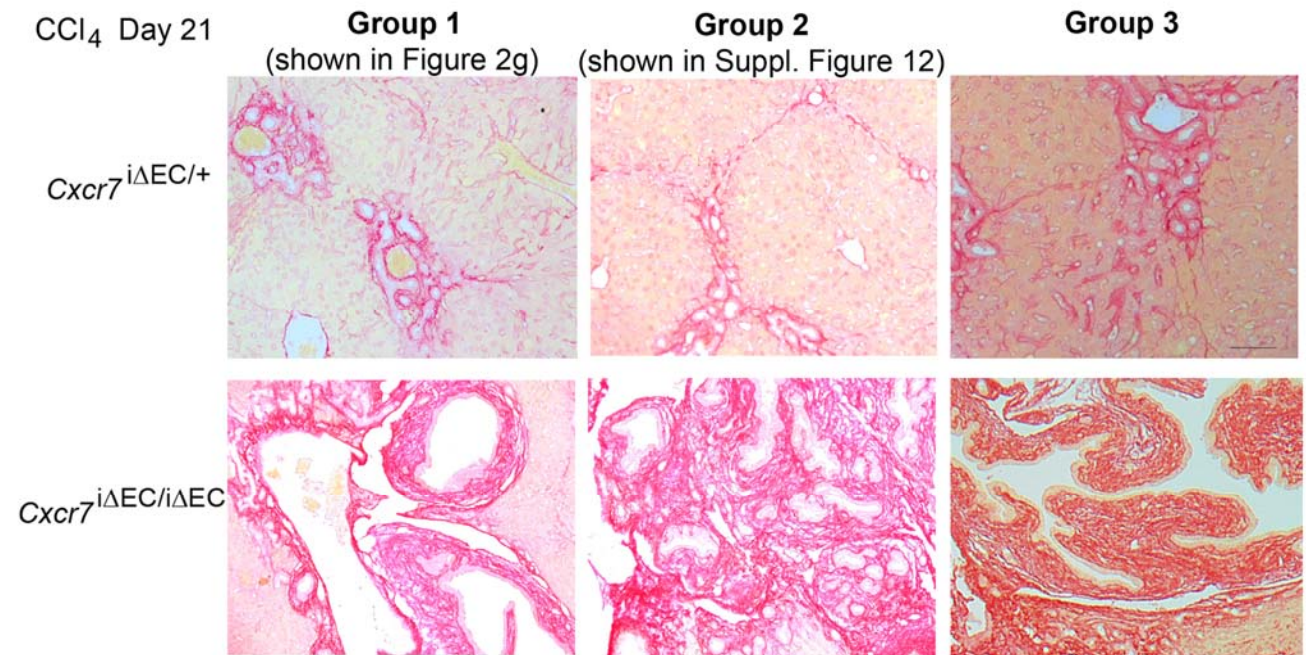

**Supplementary Figure 10. Inducible deletion of *Cxcr7* in ECs (*Cxcr7*<sup>iΔEC/iΔEC</sup>) increases collagen deposition in the liver after repeated CCl<sub>4</sub> injury.** Sirius red staining of *Cxcr7*<sup>iΔEC/+</sup> and *Cxcr7*<sup>iΔEC/iΔEC</sup> liver treated with repeated CCl<sub>4</sub>. Compared to control *Cxcr7*<sup>iΔEC/+</sup> group, collagen deposition detected by Sirius red staining was markedly enhanced in *Cxcr7*<sup>iΔEC/iΔEC</sup> group after repeated CCl<sub>4</sub> injections. Scale bar = 50 μm.

## Supplementary Figure 11

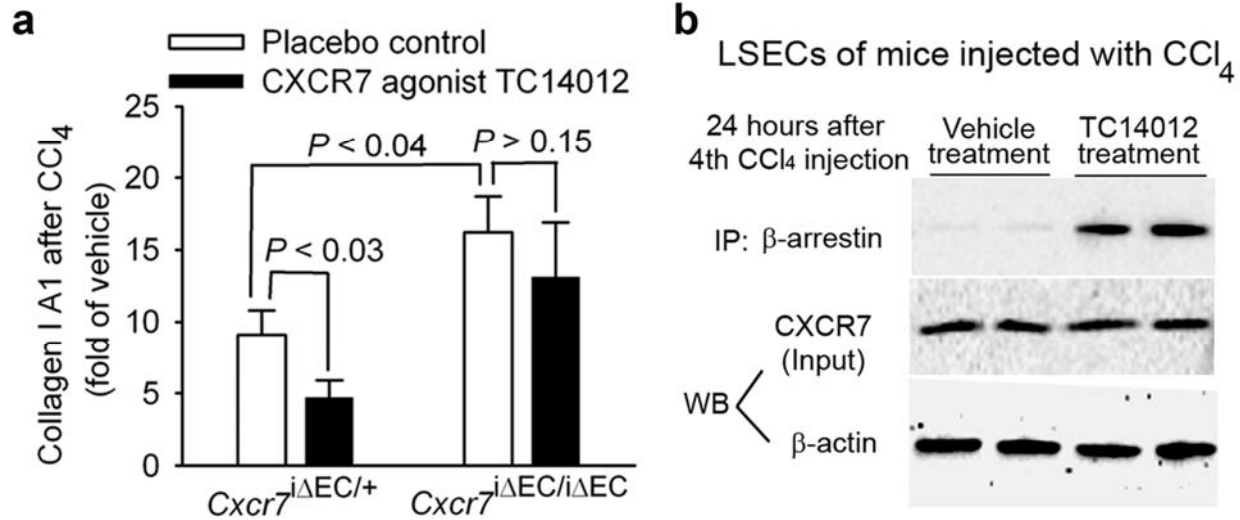

**Supplementary Figure 11. Selective activation of CXCR7 by agonist TC14012 in LSECs induces association with  $\beta$ -arrestin after  $\text{CCl}_4$  injection.**

**a) Specific activation of CXCR7 by injection of agonist TC14012 attenuates liver fibrosis.** After chronic stimulation of  $\text{CCl}_4$ , selective CXCR7 activation by TC14012 treatment (30 mg/kg) reduced  $\text{CCl}_4$ -induced collagen deposition in control but not *Cxcr7<sup>iΔEC/iΔEC</sup>* mice. Collagen accumulation was measured by immunoblot (shown in Fig. 2h). Quantification of immunoblot is shown; N = 5.

**b) During chronic liver injury, injection of TC14012 leads to interaction of  $\beta$ -arrestin with CXCR7 in LSECs.** IP-WB was used to reveal the association of CXCR7 with  $\beta$ -arrestin in LSECs.

## Supplementary Figure 12

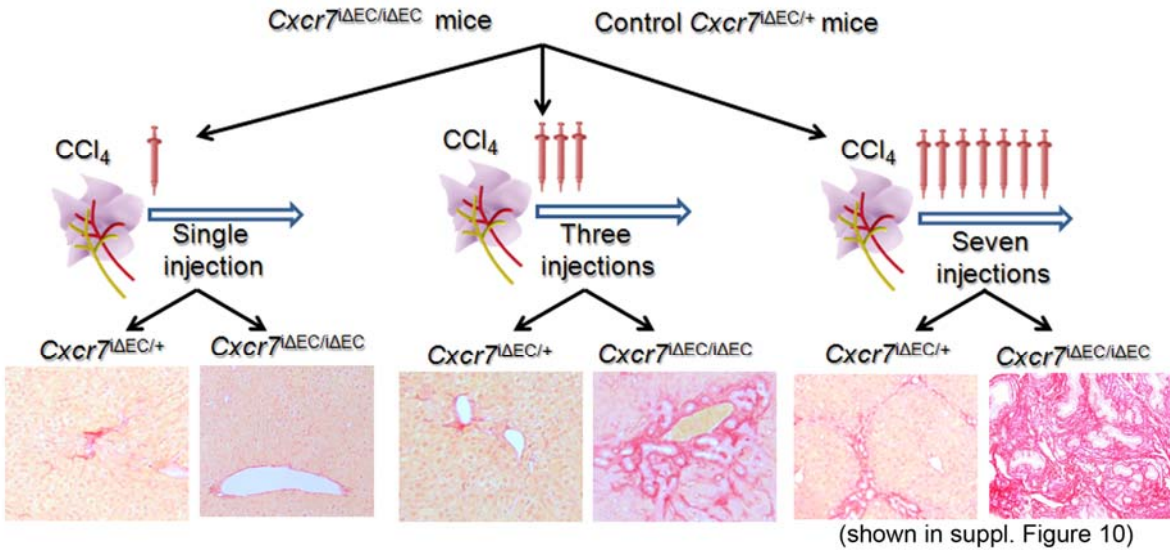

**Supplementary Figure 12. Exacerbation of liver fibrosis in *Cxcr7<sup>ΔEC/ΔEC</sup>* mice after iterative hepatotoxic injury.** Single injection of CCl<sub>4</sub> caused negligible deposition of collagen in both control and *Cxcr7<sup>ΔEC/ΔEC</sup>* mice, as evidenced by Sirius red staining. Notably, while three repeated injections of CCl<sub>4</sub> induced little collagen deposition in *Cxcr7<sup>ΔEC/+</sup>* mice, *Cxcr7<sup>ΔEC/ΔEC</sup>* mice showed significant accumulation of collagen in the liver. The extent of fibrosis was further enhanced in *Cxcr7<sup>ΔEC/ΔEC</sup>* mice after seven injections of CCl<sub>4</sub>, compared with control *Cxcr7<sup>ΔEC/+</sup>* mice.

### Supplementary Figure 13

**a**

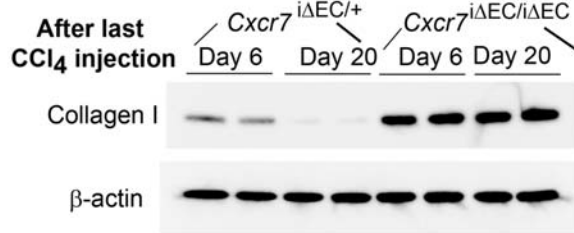

**b**

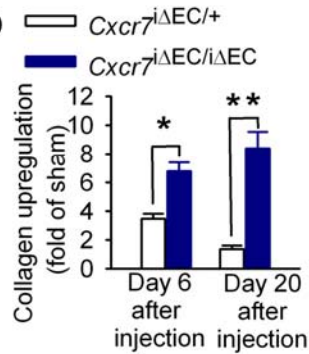

**c**

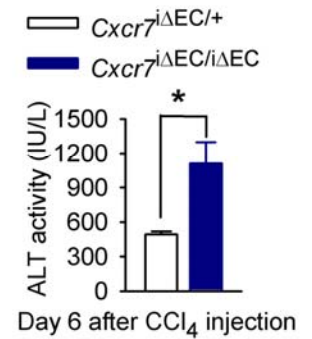

### Supplementary Figure 13. Impaired resolution of liver fibrosis in mice that are deficient of *Cxcr7* in ECs (*Cxcr7*<sup>iΔEC/iΔEC</sup>).

**a, b)** Time-dependent reduction of collagen deposition after liver injury is inhibited in mice with inducible EC-specific deletion of *Cxcr7* (*Cxcr7*<sup>iΔEC/iΔEC</sup>). Schedule of CCl<sub>4</sub> injection was described in Figure 2i. Compared to control mice, there was significantly higher collagen I protein level in *Cxcr7*<sup>iΔEC/iΔEC</sup> mice. In contrast to the reduced collagen level in control mice at day 20, collagen content after liver injury persisted in *Cxcr7*<sup>iΔEC/iΔEC</sup> mice.

**c)** Exacerbated liver injury in mice after liver injury. Serum alanine aminotransferase (ALT) level was markedly enhanced in *Cxcr7*<sup>iΔEC/iΔEC</sup> mice than that of control mice, suggesting elevated liver damage. These data demonstrate the defective capacity of resolving liver injury in *Cxcr7*<sup>iΔEC/iΔEC</sup> mice.

## Supplementary Figure 14

**a**

| Vehicle | VEGF-A | FGF-2 | VEGFA + FGF-2 |
|---------|--------|-------|---------------|
| 1       | 2      | 3     | 4             |

Blot shown in Figure 3G

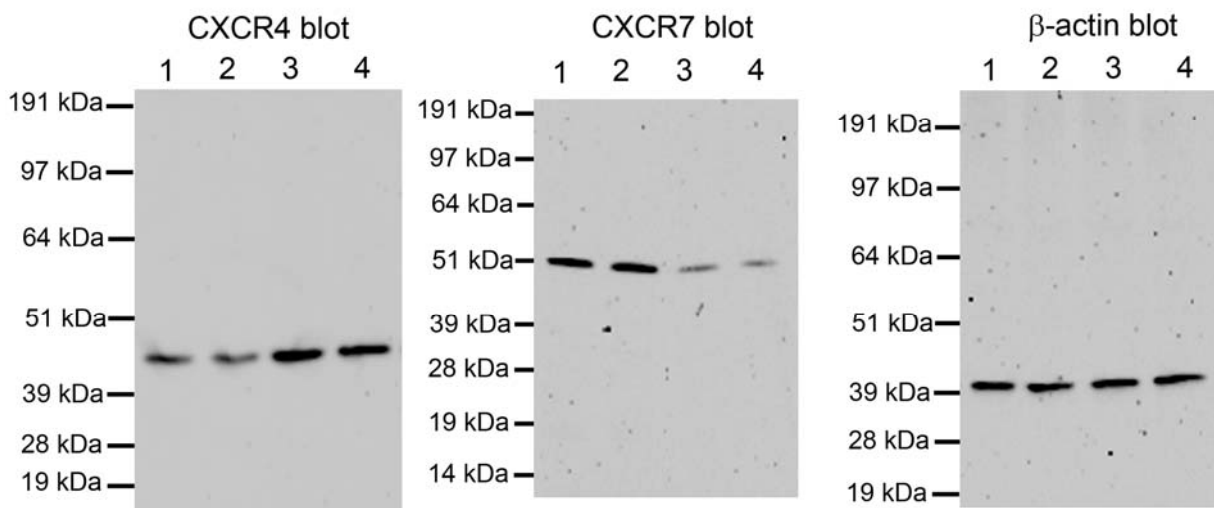

**b**

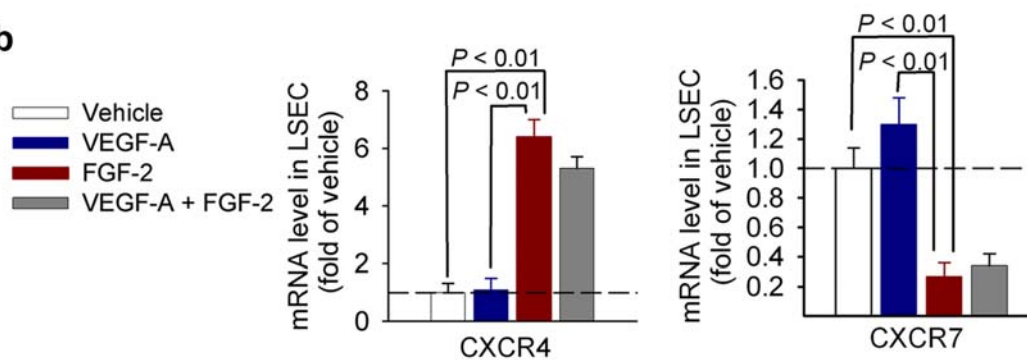

**Supplementary Figure 14. FGF-2 treatment leads to CXCR4 upregulation and CXCR7 suppression in LSECs.**

**a, b** Stimulation of FGF-2, but not VEGF-A, in LSECs caused CXCR4 upregulation and CXCR7 suppression. Representative immunoblot is shown in (a), and quantification of protein level is shown in (b); N=5. LSECs were treated with VEGF-A and FGF-2. Protein levels of SDF-1 receptors CXCR4 and CXCR7 in the treated LSECs were determined by immunoblot.

**Supplementary Figure 15**

|         |       |       |                |
|---------|-------|-------|----------------|
| Vehicle | FGF-2 | SDF-1 | SDF-1<br>FGF-2 |
| 1       | 2     | 3     | 4              |

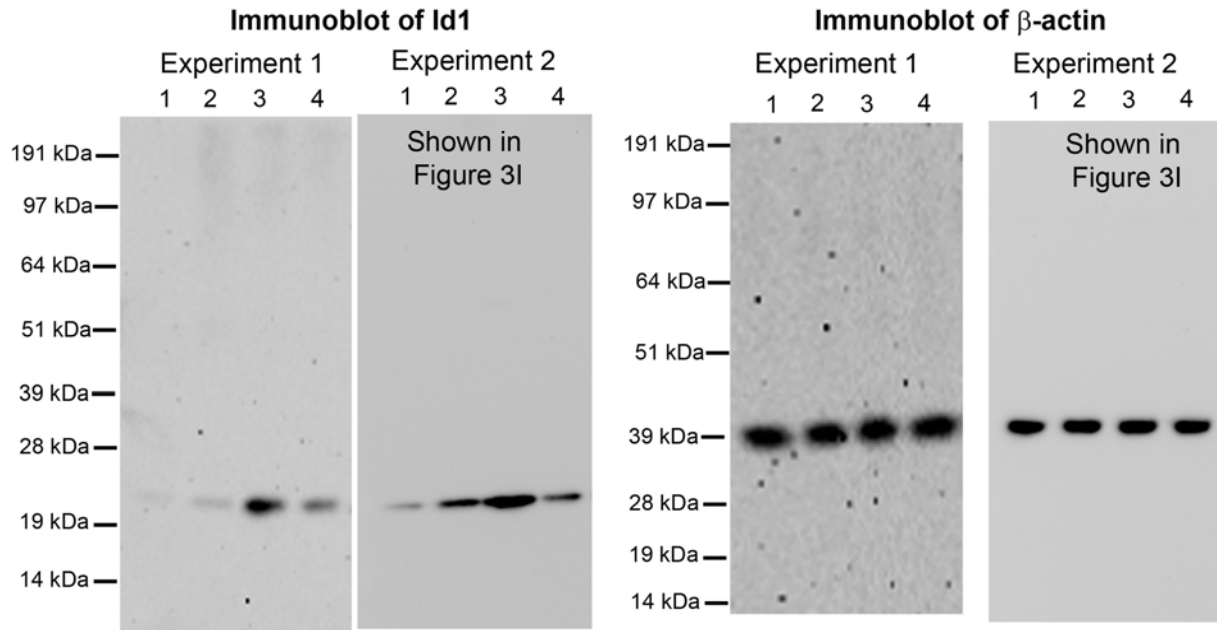

**Supplementary Figure 15. FGF-2 antagonizes SDF-1-mediated Id1 in cultivated human LSECs.** LSECs were treated with FGF-2, SDF-1, and FGF-2 + SDF-1 combination. Expression of Id1 protein was measured by immunoblot. Two independent immunoblot images are presented. These data demonstrate that FGF-2 inhibits SDF-1-dependent Id1 stimulation.

## Supplementary Figure 16

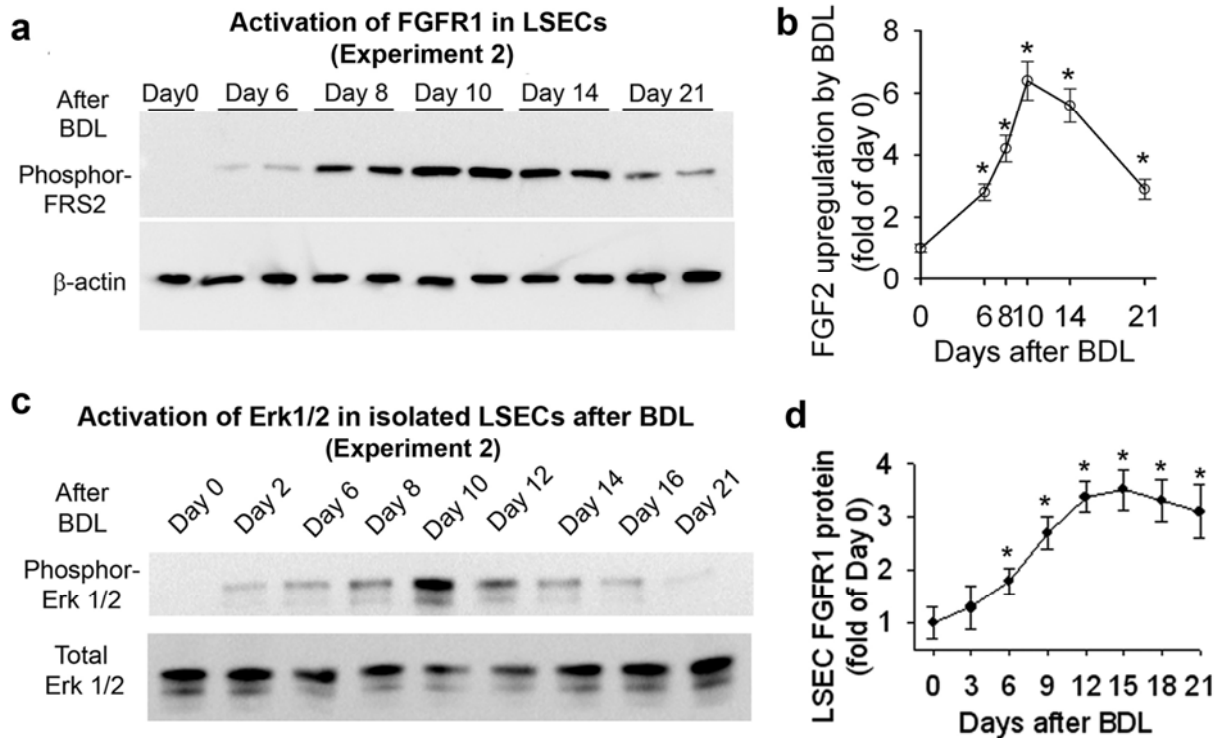

**Supplementary Figure 16. During chronic injury FGFR1 overactivation in LSECs leads to profibrotic transition of sinusoidal vascular niche.**

**a) Time-dependent activation of FGFR1 in LSECs after bile duct ligation (BDL) injury.** Phosphorylation of FGFR1 downstream effector FRS-2 (Phosphor-FRS2) was examined in isolated LSECs at different time points to measure the activation of FGFR1. Two independent immunoblot experiments are shown.

**b) Increase in FGF-2 protein deposition in the liver after BDL.** There is a time-dependent increase of FGF-2 protein level in the injured liver; \*,  $P < 0.05$ , compared with the level at day 0; N = 4.

**c) Temporal activation of MAP Kinase (Phosphor-Erk1/2) in LSECs by BDL injury.** Erk1/2 phosphorylation in LSECs was examined by immunoblot at different time points after BDL. After normalizing to total Erk1/2, Erk1/2 phosphorylation was assessed.

**d) Upregulation of FGFR1 in LSECs after BDL.** After BDL LSECs were isolated at indicated time points and the expression of FGFR1 protein was determined. \*,  $P < 0.05$ , compared with the level at day 0; N = 7.



### Supplementary Figure 17

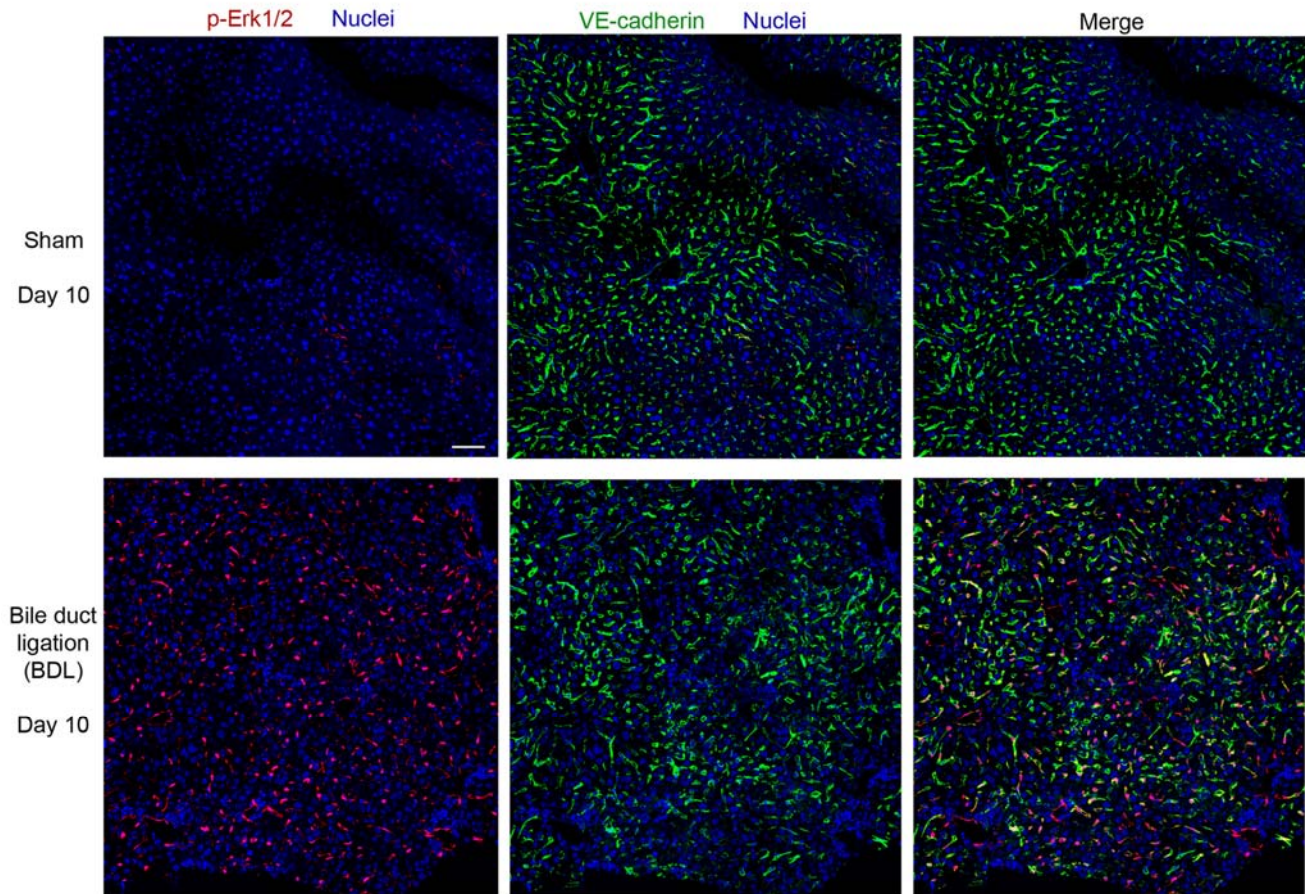

**Supplementary Figure 17. Global activation of MAP kinase (Erk1/2) in the liver during chronic injury.** MAP Kinase (Erk1/2) is activated/phosphorylated throughout the liver lobe after BDL injury. Phosphorylated Erk1/2 (p-Erk1/2, red fluorescence) was co-stained with VE-cadherin (green fluorescence). Compared with sham-operated mice, bile duct ligation (BDL) caused global appearance of p-Erk1/2 in the liver lobe. Note that the majority of the p-Erk1/2 was localized in the endothelial nucleus. Scale bar = 250  $\mu$ m.

**Supplementary Figure 18**

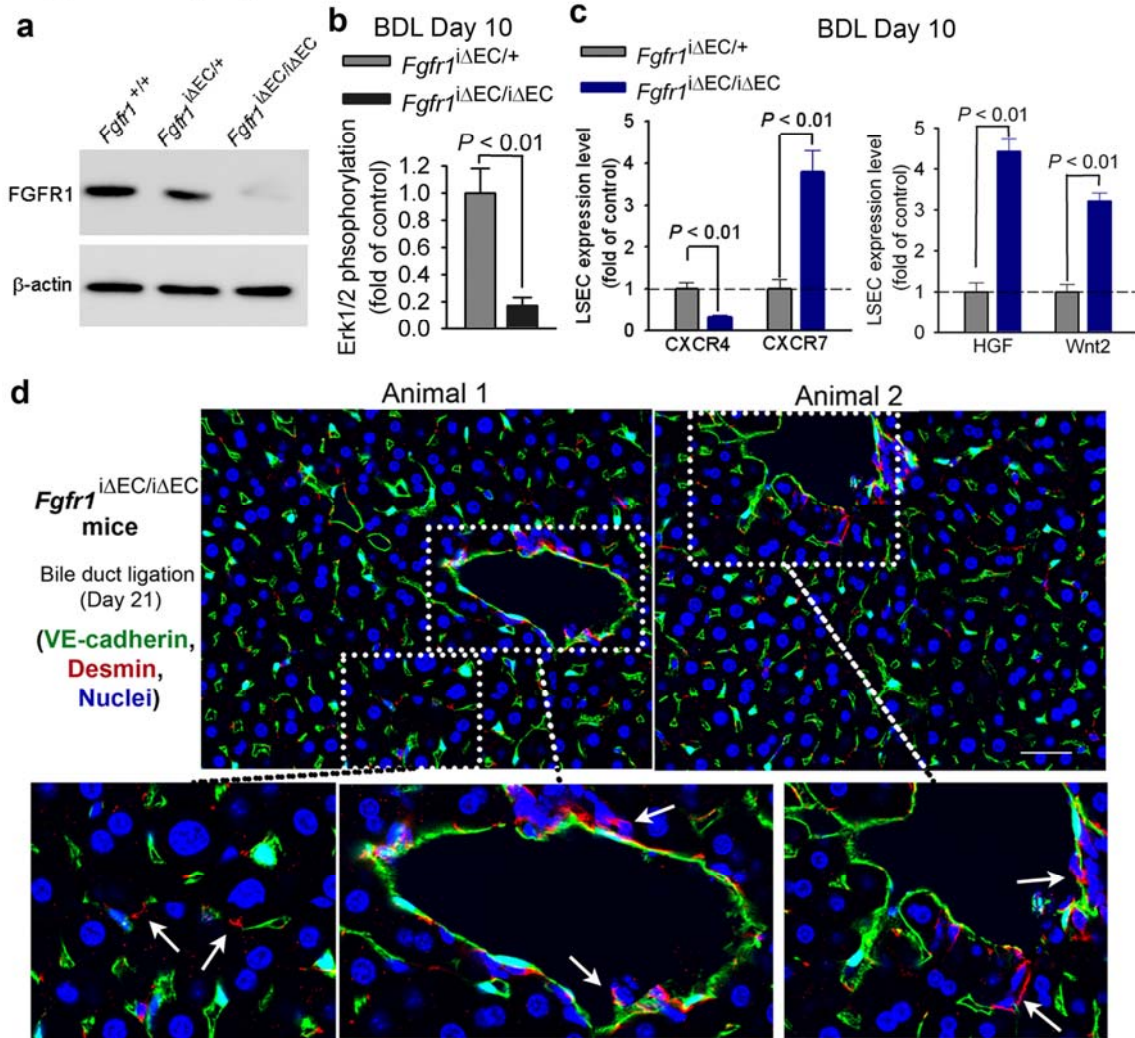

**Supplementary Figure 18. Comparable pro-fibrotic responses in wild type (WT) and mice with EC haploinsufficiency of *Fgfr1* (*Fgfr1*<sup>iΔEC/iΔEC</sup>).**

**a) Efficient deletion of *Fgfr1* in LSECs of *Fgfr1*<sup>iΔEC/iΔEC</sup> mice.** Expression of FGFR1 protein in isolated LSECs was determined by immunoblot.

**b) Inhibition in Erk1/2 activation in LSECs in *Fgfr1*<sup>iΔEC/iΔEC</sup> mice after BDL.** Erk1/2 activation/phosphorylation in LSECs after BDL was determined by immunoblot (Figure 4e). Compared to control mice, Erk1/2 activation was significantly reduced in *Fgfr1*<sup>iΔEC/iΔEC</sup> mice (F); N = 5.

**c) Restored pro-regenerative angiocrine response after injury in *Fgfr1*<sup>iΔEC/iΔEC</sup> mice.** Deletion of *Fgfr1* in ECs restored CXCR4 to CXCR7 ratio in LSECs (left panel) and enhanced expression of hepatic active factors (right panel) in LSECs after BDL; N = 4.

**d) EC-specific deletion of *Fgfr1* (*Fgfr1*<sup>iΔEC/iΔEC</sup>) in adult mice attenuates activation and expansion of desmin<sup>+</sup> fibroblasts after BDL.** The distribution of desmin<sup>+</sup> fibroblasts in the liver of *Fgfr1*<sup>iΔEC/iΔEC</sup> mice after BDL exhibited a similar pattern to those in the control liver without BDL. By contrast, there was a profound increase in desmin<sup>+</sup> fibroblasts in the control *Fgfr1*<sup>iΔEC/+</sup> mice after BDL (as demonstrated by Figure 4b). Scale bar = 50 μm.

### Supplementary Figure 19

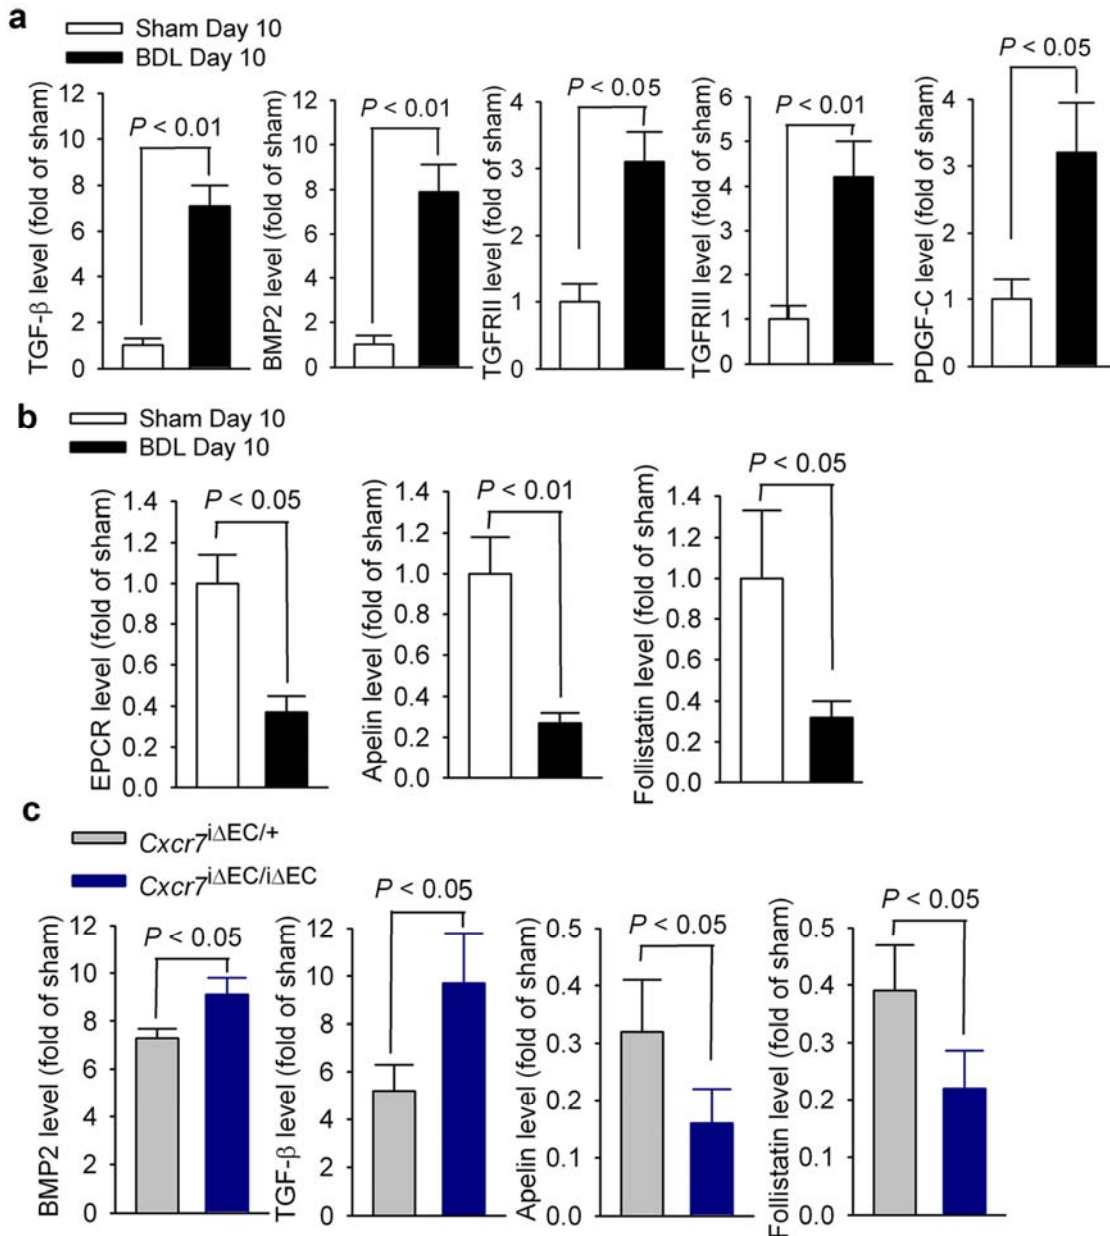

### Supplementary Figure 19. CXCR7-mediated pro-regenerative response in LSECs is antagonized by persistent BDL injury, causing pro-fibrotic transition of angiocrine signals.

**a, b)** Pro-fibrotic shift of angiocrine signals from LSECs after bile duct ligation (BDL) injury. There was a divergent expression of fibrosis-related genes in LSECs after BDL. Factors that regulate BMP and TGF pathways were significantly enhanced (a), and anti-fibrotic genes such as follistatin, apelin, and EPCR were suppressed (b); N = 6.

**c)** Pro-fibrotic transition of LSECs was exacerbated to a significant extent in *Cxcr7*<sup>ΔEC/iΔEC</sup> mice after BDL. Deletion of *Cxcr7* (*Cxcr7*<sup>ΔEC/iΔEC</sup>) in ECs exacerbated the pro-fibrotic transition of LSECs after BDL; N = 3-5.

## Supplementary Figure 20

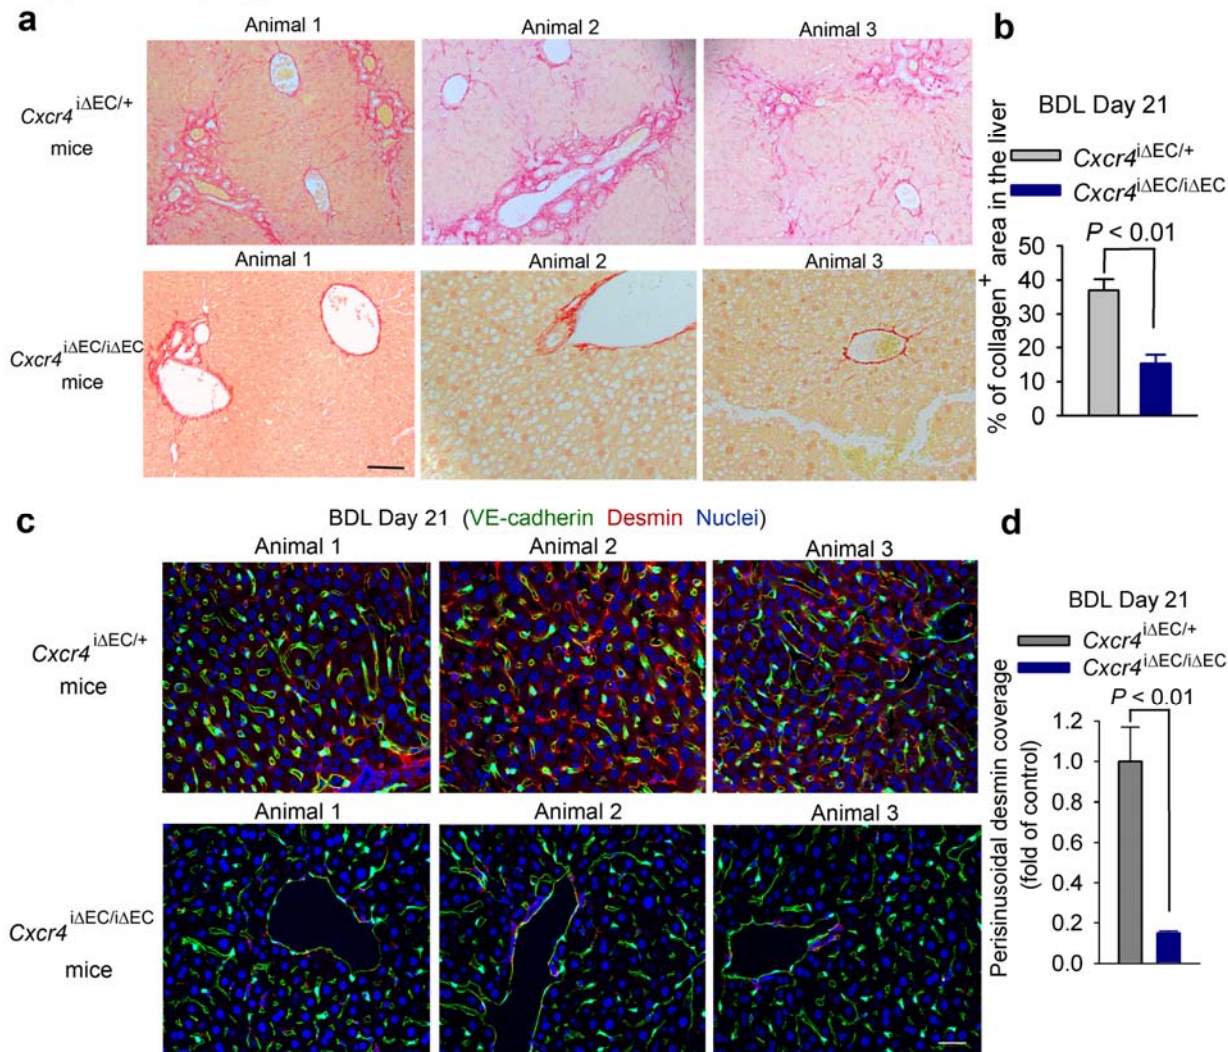

**Supplementary Figure 20. Inducible EC-specific deletion of *Cxcr4* in mice (*Cxcr4*<sup>iΔEC/iΔEC</sup> mice) inhibits liver fibrosis.**

**a, b) Significantly diminished collagen deposition** induced by BDL in the liver of *Cxcr4*<sup>iΔEC/iΔEC</sup> mice, compared to control *Cxcr4*<sup>iΔEC/+</sup> mice. Three representative images of Sirius red staining detecting collagen deposition from each group are shown in (a), and quantification of collagen<sup>+</sup> area is presented in (b). Scale bar = 50 μm. N = 4.

**c, d) Perisinusoidal enrichment of desmin<sup>+</sup> stellate-like is attenuated in *Cxcr4*<sup>iΔEC/iΔEC</sup> mice.** Images of three representative animals from each mouse genotype are presented in C. Quantification of perisinusoidal distribution of desmin<sup>+</sup> stellate-like cells in the liver is shown (d). Scale bar = 50 μm. N = 4.
